# Supplementary material
Source: MDPI journal article supplement (https://www.mdpi.com/2673-9917/1/1/5)
Supplement: s1 [file s1]

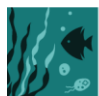

**Table S2.** Examined species list (\* new records for the Minho river, NW Iberian Peninsula).

| Species                                                         | Distribution in Portugal                                                                                           |
|-----------------------------------------------------------------|--------------------------------------------------------------------------------------------------------------------|
| <b>Balanomorpha</b>                                             |                                                                                                                    |
| <i>Austrominius modestus</i> (Darwin, 1854)                     | Recorded on the Minho river estuary*, Setúbal, Faro and Madeira island                                             |
| <b>Cumacea</b>                                                  |                                                                                                                    |
| <i>Iphinoe tenella</i> Sars, 1878                               | Recorded on the Minho river*, Troia, Alvor estuary, Lagoa de Albufeira and Ria Formosa                             |
| <i>Iphinoe trispinosa</i> (Goodsir, 1843)                       | Recorded at the Minho River* and along the Portuguese west coast                                                   |
| <i>Diastylis bradyi</i> Norman, 1879                            | Recorded at the Minho River* and along the Portuguese southwest coast                                              |
| <i>Diastylis cornuta</i> (Boeck, 1864)                          | Species recorded at the Minho River* and Portinho da Arrábida                                                      |
| <b>Decapoda</b>                                                 |                                                                                                                    |
| <i>Atyaephyra desmarestii</i> (Millet, 1831)                    | Minho, Lima, Cávado, Ave, Douro, Mondego, Tejo and Guadiana rivers                                                 |
| <i>Carcinus maenas</i> (Linnaeus, 1758)                         | Common along the Portuguese coast and estuaries                                                                    |
| <i>Crangon crangon</i> (Linnaeus, 1758)                         | On the estuaries of the rivers Minho, Lima, Cávado, Douro, Aveiro, Mira, Mondego and Tejo, and at Fuzeta beach     |
| <i>Palaemon longirostris</i> Milne Edwards, 1837                | On the estuaries of the rivers Minho*, Mira, Sado and Tejo                                                         |
| <i>Procambarus clarkii</i> (Girard, 1852)                       | In the rivers Minho, Maçãs, Douro, Mondego, Sado, Caia, Tejo, Degebe, Alamos and on São Miguel, Azores archipelago |
| <i>Processa modica</i> Williamson, 1979                         | Recorded on the Minho river* and along the Portuguese west coast                                                   |
| <b>Isopoda</b>                                                  |                                                                                                                    |
| <i>Ceratothoa</i> aff. <i>oestroides</i> (Risso, 1826)          | Recorded at the Minho river*, on Póvoa de Varzim, Matosinhos, Faro, and on Azores archipelago                      |
| <b>Cymodoce</b> sp.                                             |                                                                                                                    |
| <i>Gnathia vorax</i> (Lucas, 1849)                              | Recorded at the Minho river*, on the Mondego estuary and in Sines                                                  |
| <i>Idotea neglecta</i> Sars, 1897                               | Recorded at the Minho river*, on Tagus estuary and on Azores archipelago                                           |
| <i>Idotea pelagica</i> Leach, 1816                              | Recorded at the Minho river* and along the Portuguese west coast                                                   |
| <i>Jaera</i> ( <i>Jaera</i> ) <i>albifrons</i> Leach, 1814      | Recorded at the Minho river* and along the Portuguese west coast                                                   |
| <b>Leptostraca</b>                                              |                                                                                                                    |
| <i>Nebalia strausi</i> Risso, 1826                              | New record for Portugal*                                                                                           |
| <i>Sarsinebalia cristoboi</i> Moreira, Gestoso & Troncoso, 2003 | Recorded at the Minho river* and along the Portuguese west coast with a southern limit at Aljezur                  |
| <b>Mysida</b>                                                   |                                                                                                                    |
| <i>Gastrosaccus spinifer</i> (Goës, 1864)                       | Recorded at the Minho river and along the Portuguese coast and estuaries                                           |
| <i>Neomysis integer</i> (Leach, 1814)                           | Recorded at Ria de Aveiro and at the Minho*, Cávado and Tejo rivers                                                |
| <i>Praunus neglectus</i> (Sars, 1869)                           | Recorded at the Minho river* and in Ria de Aveiro                                                                  |
| <b>Tanaidacea</b>                                               |                                                                                                                    |
| <i>Heterotanais oerstedii</i> (Krøyer, 1842)                    | Recorded at the Minho River estuary, Ria de Aveiro and Tejo estuary                                                |
