# Supplementary material
Source: MDPI journal article supplement (https://www.mdpi.com/2673-9917/1/1/5)
Supplement: s1 [file s1 › Table S1.xlsx]

## Sheet: Folha1
Species	GenBank acession number	BOLD sequence ID	Reference
Ceratothoa oxyrrhynchaena	LC626344.1		Saito et al, unpublished
Ceratothoa oxyrrhynchaena	LC626345.1		Saito et al, unpublished
Ceratothoa oxyrrhynchaena	LC626346.1		Saito et al, unpublished
Ceratothoa oxyrrhynchaena	LC626347.1		Saito et al, unpublished
Ceratothoa oxyrrhynchaena	LC626348.1		Saito et al, unpublished
Ceratothoa oxyrrhynchaena	LC626349.1		Saito et al, unpublished
Ceratothoa oxyrrhynchaena	LC626350.1		Saito et al, unpublished
Ceratothoa oxyrrhynchaena	LC160310.1		Hata et al, 2017
Ceratothoa oxyrrhynchaena	LC160311.1		Hata et al, 2017
Ceratothoa oxyrrhynchaena	LC160312.1		Hata et al, 2017
Ceratothoa parallela	MZ127219.1		Bouguerche et al, 2021
Ceratothoa parallela	MZ127225.1		Bouguerche et al, 2021
Ceratothoa parallela	MZ127227.1		Bouguerche et al, 2021
Ceratothoa oestroides	GQ240266.1		Mladineo et al, 2009
Ceratothoa oestroides	GQ240267.1		Mladineo et al, 2009
Ceratothoa oestroides	GQ240268.1		Mladineo et al, 2009
Ceratothoa oestroides	GQ240269.1		Mladineo et al, 2009
Ceratothoa oestroides	GQ240270.1		Mladineo et al, 2009
Ceratothoa oestroides	GQ240271.1		Mladineo et al, 2009
Ceratothoa oestroides	GQ240272.1		Mladineo et al, 2009
Ceratothoa oestroides	GQ240273.1		Mladineo et al, 2009
Ceratothoa oestroides	GQ240274.1		Mladineo et al, 2009
Ceratothoa oestroides	GQ240275.1		Mladineo et al, 2009
Ceratothoa oestroides	GQ240276.1		Mladineo et al, 2009
Ceratothoa oestroides	GQ240277.1		Mladineo et al, 2009
Ceratothoa oestroides	GQ240278.1		Mladineo et al, 2009
Ceratothoa oestroides	GQ240279.1		Mladineo et al, 2009
Ceratothoa oestroides	GQ240280.1		Mladineo et al, 2009
Ceratothoa carinata	MK652479.1		Welicky et al, unpublished
Ceratothoa retusa	MK652478.1		Welicky et al, unpublished
Ceratothoa africanae	MK652477.1		Welicky et al, unpublished
Ceratothoa verrucosa	LC160317.1		Hata et al, 2017
Ceratothoa verrucosa	LC160318.1		Hata et al, 2017
Ceratothoa verrucosa	LC159556.1		Hata et al, 2017
Ceratothoa verrucosa	LC159557.1		Hata et al, 2017
Ceratothoa arimae	LC159544.1		Hata et al, 2017
Ceratothoa collaris	EF455816.1		Ketmaier et al, 2007
Ceratothoa italica	EF455813.1		Ketmaier et al, 2007
Ceratothoa italica	EF455814.1		Ketmaier et al, 2007
Ceratothoa italica	EF455815.1		Ketmaier et al, 2007
Ceratothoa italica	JN604340.1		Sala-Bozano et al, unpublished
Ceratothoa italica	JN604341.1		Sala-Bozano et al, unpublished
Ceratothoa italica	JN604342.1		Sala-Bozano et al, unpublished
Ceratothoa italica	JN604343.1		Sala-Bozano et al, unpublished
Ceratothoa italica	JN604344.1		Sala-Bozano et al, unpublished
Ceratothoa italica	JN604345.1		Sala-Bozano et al, unpublished
Ceratothoa italica	JN604346.1		Sala-Bozano et al, unpublished
Ceratothoa italica	JN604347.1		Sala-Bozano et al, unpublished
Ceratothoa italica	JN604348.1		Sala-Bozano et al, unpublished
Ceratothoa italica	JN604349.1		Sala-Bozano et al, unpublished
Ceratothoa italica	JN604350.1		Sala-Bozano et al, unpublished
Ceratothoa italica	JN604351.1		Sala-Bozano et al, unpublished
Ceratothoa italica	JN604352.1		Sala-Bozano et al, unpublished
Ceratothoa italica	JN604353.1		Sala-Bozano et al, unpublished
Ceratothoa italica	JN604354.1		Sala-Bozano et al, unpublished
Ceratothoa italica	JN604355.1		Sala-Bozano et al, unpublished
Ceratothoa italica	JN604356.1		Sala-Bozano et al, unpublished
Ceratothoa italica	JN604357.1		Sala-Bozano et al, unpublished
Ceratothoa italica	JN604358.1		Sala-Bozano et al, unpublished
Ceratothoa italica	JN604359.1		Sala-Bozano et al, unpublished
Ceratothoa italica	JN604360.1		Sala-Bozano et al, unpublished
Ceratothoa italica	JN604361.1		Sala-Bozano et al, unpublished
Ceratothoa italica	JN604362.1		Sala-Bozano et al, unpublished
Ceratothoa italica	JN604363.1		Sala-Bozano et al, unpublished
Ceratothoa italica	JN604364.1		Sala-Bozano et al, unpublished
Ceratothoa italica	JN604365.1		Sala-Bozano et al, unpublished
Ceratothoa italica	JN604366.1		Sala-Bozano et al, unpublished
Ceratothoa italica	JN604367.1		Sala-Bozano et al, unpublished
Ceratothoa italica	JN604368.1		Sala-Bozano et al, unpublished
Ceratothoa italica	JN604369.1		Sala-Bozano et al, unpublished
Ceratothoa italica	JN604370.1		Sala-Bozano et al, unpublished
Ceratothoa italica	JN604371.1		Sala-Bozano et al, unpublished
Cymodoce emarginata		DSISO023-16
Cymodoce truncata		DSISO024-16
Cymodoce truncata		PMACA062-17
Cymodoce truncata		PMACA063-17
Cymodoce truncata		PMACA064-17
Cymodoce truncata		PMACA065-17
Cymodoce truncata		PMACA066-17
Cymodoce tribullis	KJ410455		Khalaji-Pirbalouty & Raupach, 2014
Cymodoce tribullis	KJ410456		Khalaji-Pirbalouty & Raupach, 2014
Cymodoce tribullis	KJ410457		Khalaji-Pirbalouty & Raupach, 2014
Cymodoce tribullis	KJ410458		Khalaji-Pirbalouty & Raupach, 2014
Cymodoce tribullis	KJ410459		Khalaji-Pirbalouty & Raupach, 2014
Cymodoce cf. tribullis	MG936571		Jeffery, unpublished
Cymodoce delvarii	KJ410460		Khalaji-Pirbalouty & Raupach, 2014
Cymodoce delvarii	KJ410461		Khalaji-Pirbalouty & Raupach, 2014
Cymodoce delvarii	KJ410462		Khalaji-Pirbalouty & Raupach, 2014
Cymodoce delvarii	KJ410463		Khalaji-Pirbalouty & Raupach, 2014
Cymodoce delvarii	KJ410464		Khalaji-Pirbalouty & Raupach, 2014
Cymodoce delvarii	MG936272		Jeffery, unpublished
Cymodoce delvarii	MG936611		Jeffery, unpublished
Cymodoce delvarii	MG936499		Jeffery, unpublished
Cymodoce delvarii	MG936103		Jeffery, unpublished
Cymodoce wageleii	KJ410469		Khalaji-Pirbalouty & Raupach, 2014
Cymodoce wageleii	KJ410470		Khalaji-Pirbalouty & Raupach, 2014
Cymodoce wageleii	KJ410471		Khalaji-Pirbalouty & Raupach, 2014
Cymodoce wageleii	KJ410472		Khalaji-Pirbalouty & Raupach, 2014
Cymodoce wageleii	HQ966539		iBOL Data Release, unpublished
Cymodoce wageleii	HQ966540		iBOL Data Release, unpublished
Cymodoce wageleii	HQ966541		iBOL Data Release, unpublished
Cymodoce wageleii	HQ966542		iBOL Data Release, unpublished
Cymodoce fuscina	KJ410466		Khalaji-Pirbalouty & Raupach, 2014
Cymodoce fuscina	KJ410467		Khalaji-Pirbalouty & Raupach, 2014
Cymodoce fuscina	KJ410468		Khalaji-Pirbalouty & Raupach, 2014
Cymodoce fuscina	KJ410469		Khalaji-Pirbalouty & Raupach, 2014
Cymodoce fuscina	KJ410470		Khalaji-Pirbalouty & Raupach, 2014
